# Supplementary material
Source: HighWire-hosted journal article supplement (http://jpet.aspetjournals.org/highwire/filestream/145482/field_highwire_adjunct_files/0/258624SupplData.pdf)
Supplement: 258624SupplData.pdf [file 258624SupplData.pdf]

***In vivo* evaluation of isoprenoid triazole bisphosphonate inhibitors of geranylgeranyl diphosphate synthase: impact of olefin stereochemistry on toxicity and biodistribution**

Staci L. Haney, Yashpal S. Chhonker, Michelle L. Varney, Geoffrey Talmon, Lynette M. Smith, Daryl J. Murry, and Sarah A. Holstein

Journal of Pharmacology and Experimental Therapeutics

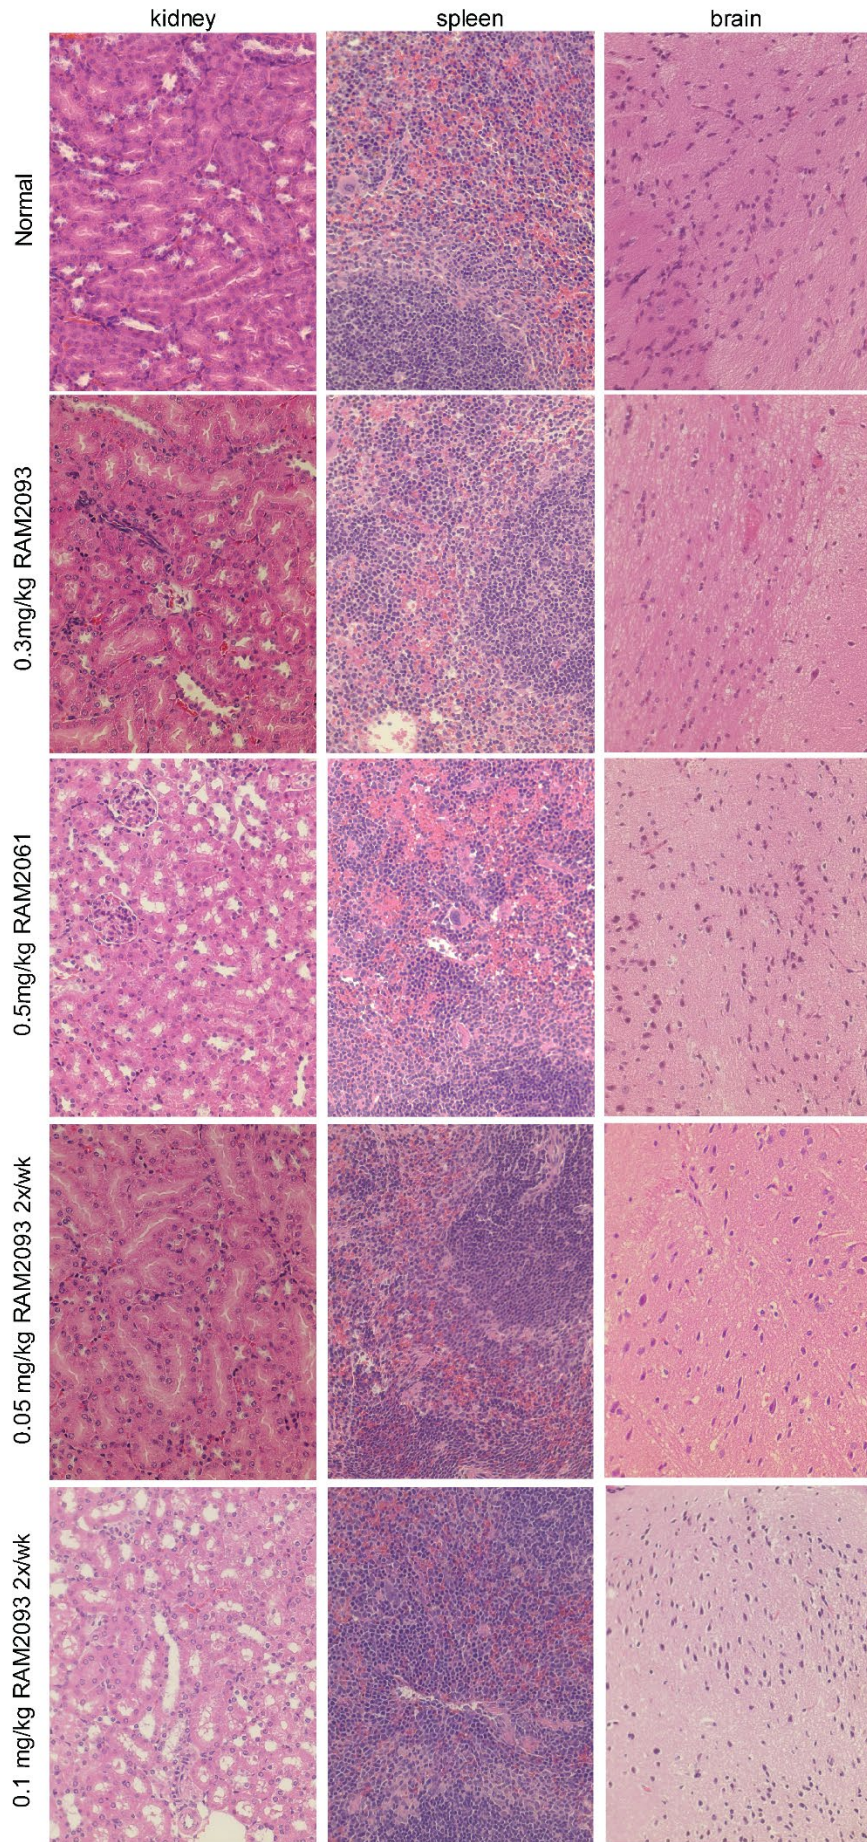

**Supplemental Figure 1. The effects of RAM2061 and RAM2093 on tissue morphology.** Kidney, spleen and brain H&E sections (200×) from mice following IV injection with 0.3 mg/kg RAM2093, 0.5 mg/kg RAM2093, 0.1 mg/kg 2x/wk RAM2061, and 0.05 mg/kg 2x/wk. RAM2093. Normal tissue sections are shown as controls. Single dose tissues were collected 14 days post injection and multi-dose tissue were collected 35 days post injection.

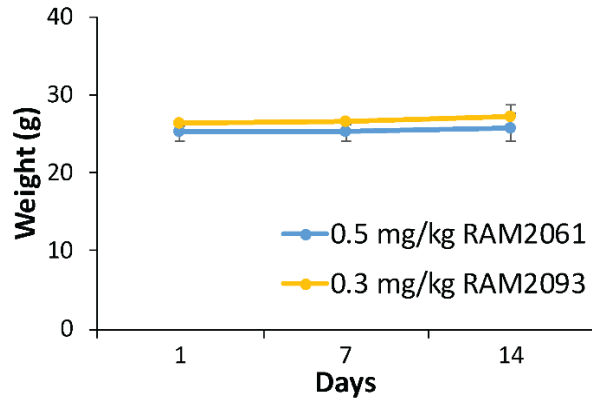

**Supplemental Figure 2. RAM2061 and RAM2093 do not alter animal weight.** Weight (grams) of mice were recorded at days 1, 7 and 14 following IV administration of 0.3 mg/kg RAM2093 or 0.5 mg/kg RAM2061. Error bars denote Stdev. N=5.

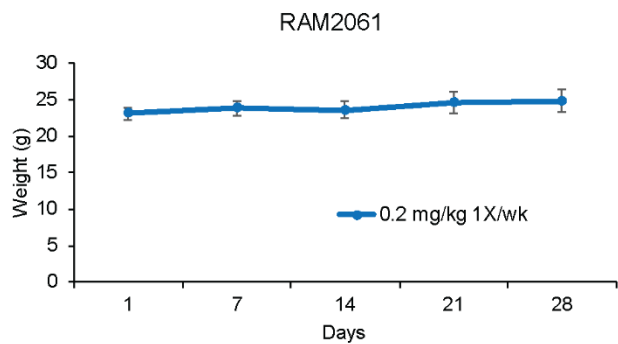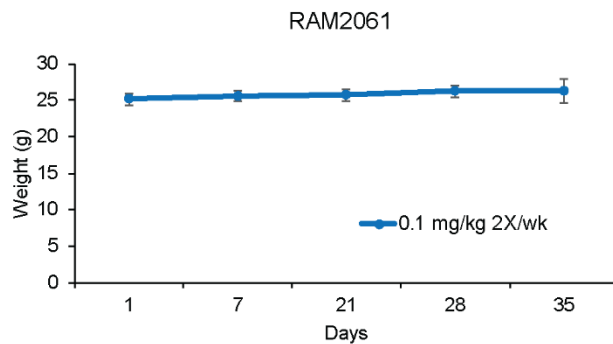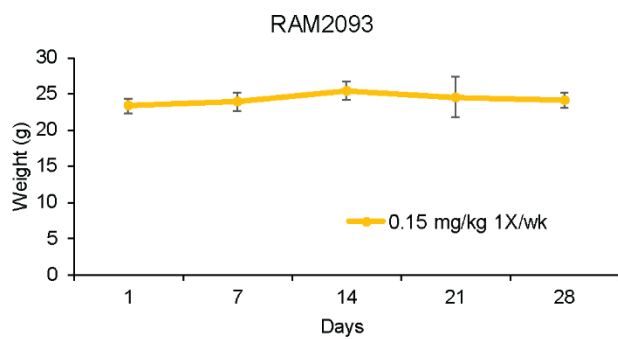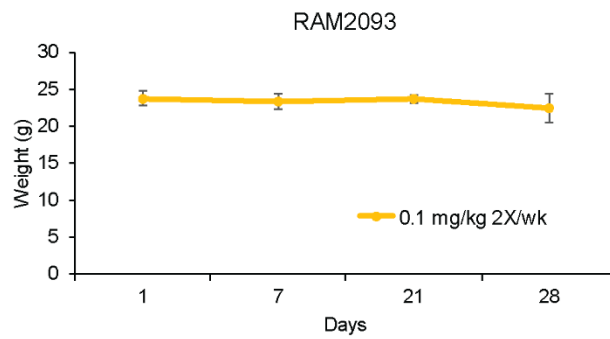

**Supplemental Figure 3. Multiple doses of RAM2061 and RAM2093 do not alter animal weight.** Weight (grams) of mice were recorded once weekly following IV administration of once or twice weekly regimens of RAM2093 and RAM2061. Error bars denote Stdev. N=5.

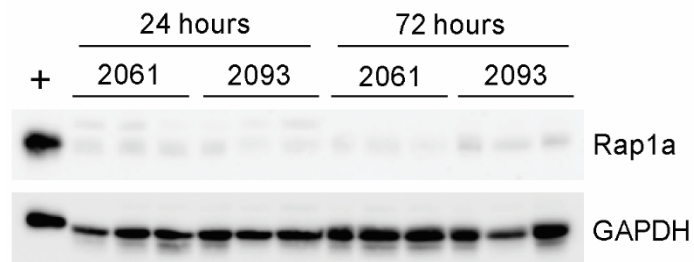

**Supplemental Figure 4. Single dose of GGDPS inhibitor is not sufficient to disrupt protein geranylgeranylation in vivo.** Immunoblot analysis of unmodified Rap1a in livers collected from mice treated with a single IV dose of 0.3mg/kg RAM2061 or RAM2093. Tissues were collected 24 and 72 hours post injection. Lovastatin treated MM.1S cells served as a positive control. GAPDH is shown as a loading control.

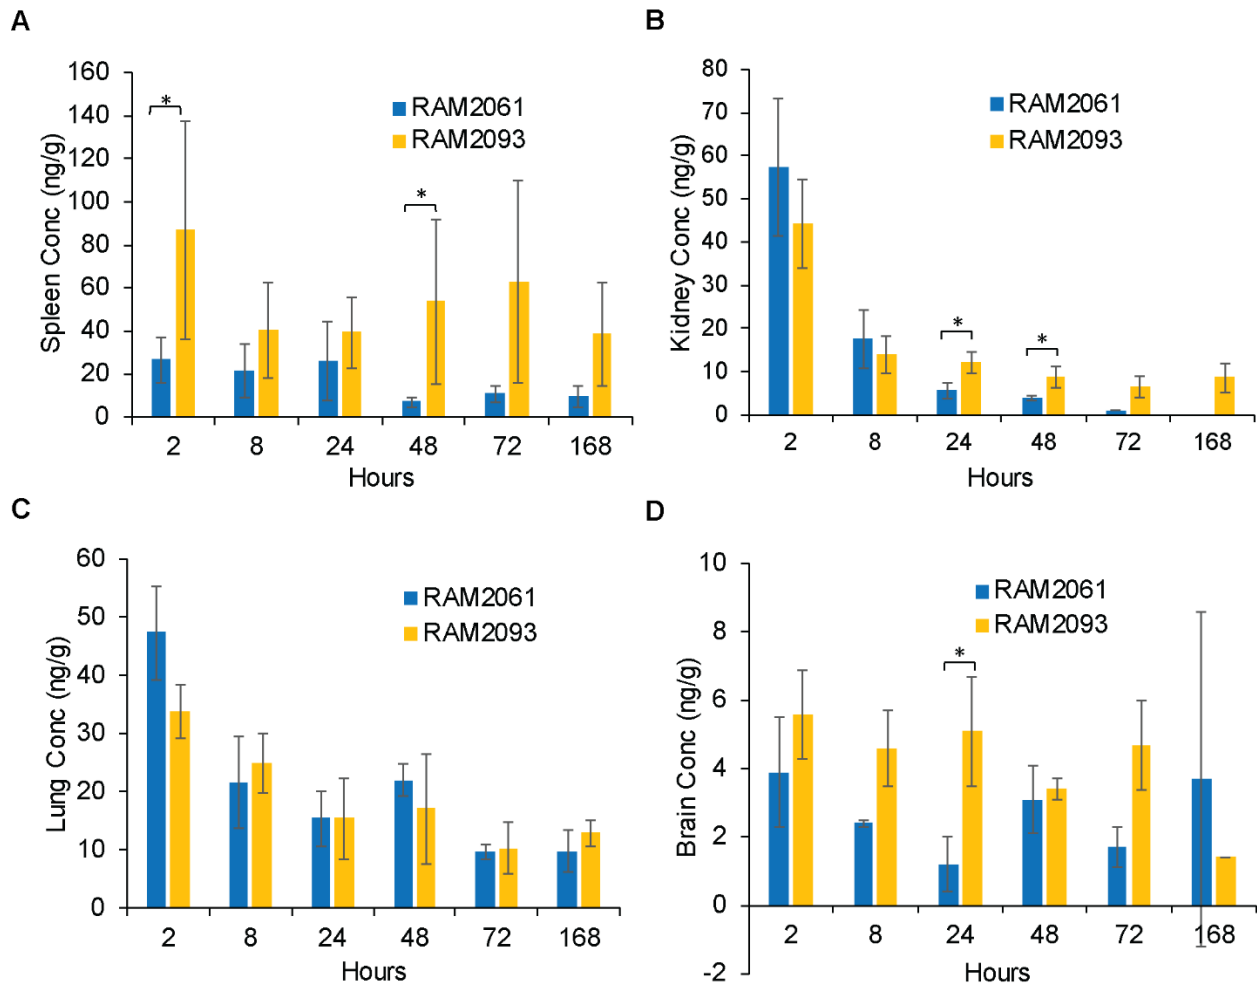

**Supplemental Figure 5. Tissue distribution patterns.** Tissue concentrations (spleen, kidney, lung, and brain) over time for RAM2061 and RAM2093 following a single dose (0.3 mg/kg IV). \*P < 0.05, two tailed student t-test. n=5 (spleen) and n=3 (lung, kidney and brain).

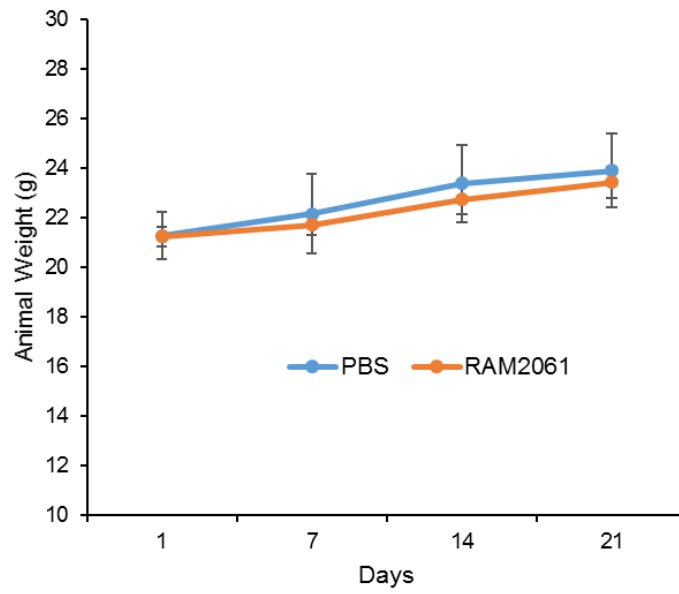

**Supplemental Figure 6. Multiple doses of RAM2061 do not alter animal weight in MM1.S tumor xenograft studies.** Weight (grams) of mice were recorded once weekly during twice-weekly IV administration of RAM2061 or PSB. Error bars denote Stdev.



Supplemental Table 1: qRT-PCR primers used in these studies.

|                |                          |
|----------------|--------------------------|
| <b>ATF4</b>    |                          |
| F              | AAGCCTAGGTCTCTTAGATG     |
| R              | TTCCAGGTCATCTATACCCA     |
| <b>β-ACTIN</b> |                          |
| F              | ACGTTGCTATCCAGGCTGTGCTAT |
| R              | TTAATGTCACGCACGATTTCCCGC |
| <b>CHOP</b>    |                          |
| F              | TCTTCACCACTCTTGACCCTGCTT |
| R              | GTTCTTTCTCCTTCATGCGCTGCT |
| <b>IRE1</b>    |                          |
| F              | AGACTTTGTCATCGGCCTTTGCAG |
| R              | ATTCACTGTCCACAGTCACCACCA |
| <b>PERK</b>    |                          |
| F              | GCAACAACGTTTATTGTGCGCAGG |
| R              | AAACAACCTCAAAGCCACCACGTC |

Supplemental Table 2: Western blot antibodies used in these studies

| <b>Antibody</b>   | <b>Company</b> | <b>Cat. #</b> | <b>Dilution</b> |
|-------------------|----------------|---------------|-----------------|
| ATF-4             | Cell Signaling | 11815         | 1:1000          |
| Cleaved Caspase 3 | Cell Signaling | 9664          | 1:500           |
| Cleaved Caspase 8 | Cell Signaling | 9496          | 1:500           |
| eIF2 $\alpha$     | Cell Signaling | 9722          | 1:1000          |
| p-eIF2 $\alpha$   | Cell Signaling | 3597          | 1:1000          |
| $\beta$ -Tubulin  | Sigma          | T5201         | 1:25,000        |
| Rap1a             | Santa Cruz     | sc-373968     | 1:500           |

Supplemental Table 3: Blood Chemistry panel for single dose testing of 0.3mg/kg RAM2061

Blood was collected at 7 and 14 days post-injection (Mean  $\pm$  SD, n = 4 mice per group).

|             |            | 0.3 mg/kg RAM2061 |                  |
|-------------|------------|-------------------|------------------|
|             |            | Day 7             | Day 14           |
|             | Normal     | Average           | Average          |
| <b>BUN</b>  | 9 to 33    | 18.5 $\pm$ 2.9    | 20.3 $\pm$ 1.5   |
| <b>CRE</b>  | 0.2 to 0.9 | 0.3 $\pm$ 0.06    | 0.3 $\pm$ 0.2    |
| <b>ALT</b>  | 17 to 77   | 363 $\pm$ 62.8    | 62.8 $\pm$ 2.2   |
| <b>ALP</b>  | 35 to 222  | 78.5 $\pm$ 73.8   | 73.8 $\pm$ 5.9   |
| <b>AST</b>  | 54 to 298  | 424.3 $\pm$ 100   | 100.3 $\pm$ 21.4 |
| <b>TBIL</b> | 0 to 0.9   | 0.3 $\pm$ 0.05    | 0.3 $\pm$ 0.1    |
| <b>GLU</b>  | 140 to 263 | 128 $\pm$ 11      | 145.8 $\pm$ 15.1 |
| <b>CA</b>   | 6 to 13    | 11.5 $\pm$ 0.6    | 10.6 $\pm$ 0.3   |
| <b>TP</b>   | 3.9 to 6.4 | 5.7 $\pm$ 0.06    | 5.5 $\pm$ 0.2    |
| <b>ALB</b>  | 2.5 to 4.6 | 4.7 $\pm$ 0.2     | 4.4 $\pm$ 0.1    |
| <b>GLOB</b> | 1.2 to 2.2 | 1 $\pm$ 0.16      | 1 $\pm$ 0.2      |
| <b>Na</b>   | 110 to 195 | 149.3 $\pm$ 2.2   | 150.3 $\pm$ 0.5  |
| <b>K</b>    | 4 to 10.5  | 7.9 $\pm$ 0.5     | 8 $\pm$ 0.7      |
| <b>Cl</b>   | NR         | 110.5 $\pm$ 2.5   | 110.8 $\pm$ 2.8  |
| <b>TCO2</b> | NR         | 24.8 $\pm$ 3      | 24.8 $\pm$ 5     |

Abbreviations: blood urea nitrogen (BUN), creatinine (CRE), alanine aminotransferase (ALT), alkaline phosphatase (ALP), aspartate aminotransferase (AST), total bilirubin (TBIL), glucose (GLU), total protein (TP), albumin (ALB), globulin (GLOB), lactate dehydrogenase (LDH), creatine kinase (CK), NR (not reported),
